# Supplementary material for: Supplementation with a Natural Source of Amino Acids, Sil-Q1 (Silk Peptide), Enhances Natural Killer Cell Activity: A Redesigned Clinical Trial with a Reduced Supplementation Dose and Minimized Seasonal Effects in a Larger Population
Source: MDPI journal article supplement (doi:10.3390/nu13092930), 2021-08-24
Supplement: s1 [file s1]

Supplementation with a natural source of amino acids, Sil-Q1 (silk peptide), enhances natural killer cell activity: a redesigned clinical trial with a reduced supplementation dose and minimized seasonal effects in a larger population

Jung Min Cho<sup>1,†</sup>, Dokyeong Yoo<sup>1,†</sup>, Jeong-Yong Lee<sup>2</sup>, Mi-Sun Oh<sup>2</sup>, Ki-Chan Ha<sup>3</sup>, Hyang-Im Baek<sup>3</sup>, Seung-Min Lee<sup>4,5</sup>, Jong Ho Lee<sup>1,5</sup>, Hye Jin Yoo<sup>1,5,\*</sup>

Online Supplementary Material

Supplementary Table S1. Results of other cytokines and immunoglobulins (secondary endpoints)

|               | SQ group (n=61) |                 |                 |                              | Placebo (n=57)  |                 |                |                              | <i>p</i> -value <sup>b</sup> |
|---------------|-----------------|-----------------|-----------------|------------------------------|-----------------|-----------------|----------------|------------------------------|------------------------------|
|               | T0              | T8              | Δ               | <i>p</i> -value <sup>a</sup> | T0              | T8              | Δ              | <i>p</i> -value <sup>a</sup> |                              |
| IL-2 (pg/mL)  | 31.35 ± 19.50   | 33.90 ± 18.75   | 2.56 ± 10.45    | 0.061                        | 34.16 ± 16.66   | 39.58 ± 20.58   | 5.42 ± 10.38   | 0.001                        | 0.139                        |
| IFN-γ (pg/mL) | 5.97 ± 6.36     | 4.20 ± 3.31     | -1.76 ± 4.36    | 0.003                        | 6.38 ± 6.70     | 5.54 ± 5.98     | -0.84 ± 6.96   | 0.368                        | 0.887                        |
| TNF-α (pg/mL) | 0.63 ± 0.17     | 0.77 ± 0.40     | 0.13 ± 0.40     | 0.012                        | 0.68 ± 0.22     | 0.80 ± 0.45     | 0.12 ± 0.47    | 0.055                        | 0.393                        |
| IL-6 (pg/mL)  | 1.68 ± 2.13     | 1.41 ± 1.02     | -0.27 ± 2.09    | 0.314                        | 1.49 ± 0.79     | 1.45 ± 0.80     | -0.04 ± 0.56   | 0.606                        | 0.405                        |
| IL-1β (pg/mL) | 0.06 ± 0.03     | 0.05 ± 0.05     | 0.00 ± 0.06     | 0.564                        | 0.07 ± 0.06     | 0.05 ± 0.04     | -0.02 ± 0.07   | 0.028                        | 0.185                        |
| IgG1 (mg/L)   | 7186.89±1241.88 | 7333.11±1278.46 | 146.23 ± 464.79 | 0.017                        | 7630.88±1436.76 | 7701.40±1421.29 | 70.53 ± 496.52 | 0.288                        | 0.394                        |
| IgG2 (mg/L)   | 4401.31±1465.18 | 4449.34±1494.48 | 48.03 ± 400.59  | 0.353                        | 4083.68±1574.20 | 4126.67±1572.67 | 42.98 ± 301.73 | 0.287                        | 0.938                        |

Values are presented as the mean ± standard deviation (SD). <sup>a</sup> Analyzed by a paired *t*-test between T0 and T8 within each group. <sup>b</sup> Analysis by an independent *t*-test for change value between the groups. Δ (delta) represents changed values (the change from T0 at T8). IFN: interferon. Ig: immunoglobulin. IL: interleukin. SQ: Sil-Q1. TNF: tumor necrosis factor. T0: baseline. T8: follow-up.
